# Supplementary material
Source: PubMed Central journal article supplement (PMC2804167)
Supplement: supp_M109.055475_jbc.M109.055475-1.pdf [file supp_M109.055475_jbc.M109.055475-1.pdf]

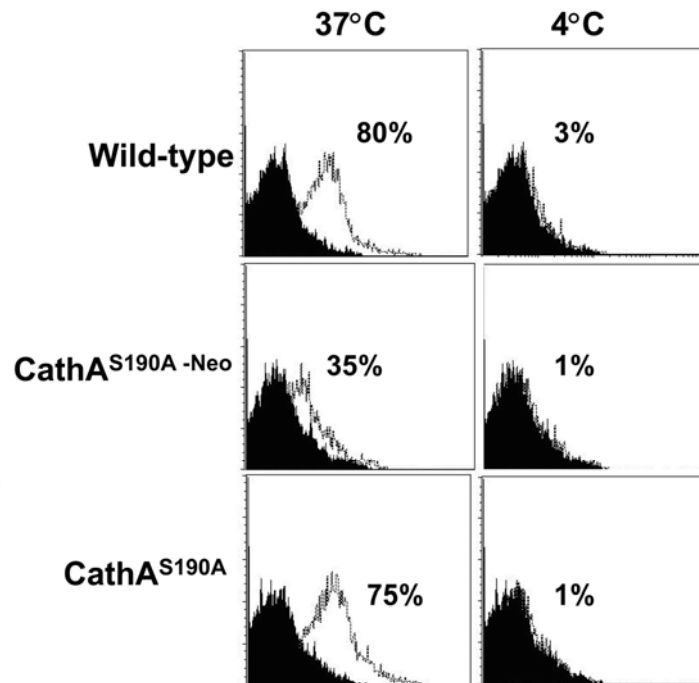

**Supplementary Figure 1. Reduced phagocytosis of IgG-opsonized latex beads by splenocytes from *CathA*<sup>S190A-Neo</sup> mice.**

MØ obtained by differentiation of adhesive spleen cells of WT, *CathA*<sup>S190A</sup> or *CathA*<sup>S190A-Neo</sup> mice were incubated for 3 h with fluorescent polystyrene latex beads opsonized or not with mouse IgG1 at 37°C or 4°C at 1:50 ratio, washed with ice cold PBS, fixed in 4% paraformaldehyde and analyzed by flow cytometry. The panels show overlap of the histograms of the cells incubated with opsonized beads and without the beads (black histogram). Figures on the panels show the percent of beads-positive cells.

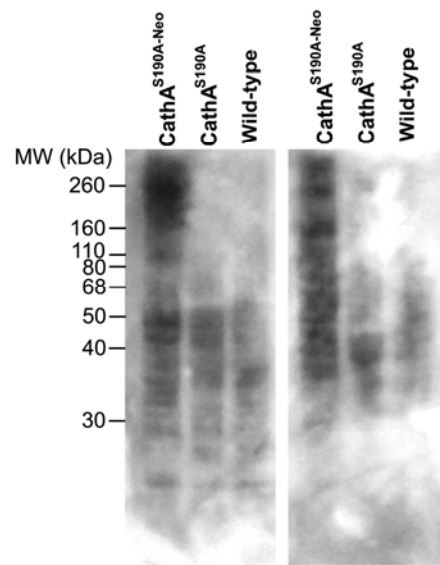

**Supplementary Figure 2. Induced staining of proteins in MØ from *CathA*<sup>S190A-Neo</sup> mice by the lectin from *Maackia amurensis*.**

Proteins from total homogenates of MØ from WT, *CathA*<sup>S190A-Neo</sup> and *CathA*<sup>S190A</sup> mice were resolved by SDS-PAGE and analyzed by lectin blot using biotinylated *Maackia amurensis* lectin II in dilution 1:5,000 (**left panel**) and 1:10,000 (**right panel**). Positions of MW markers are indicated on the left of the blot.
